1 **Title:** The volatile cedrene from plant beneficial *Trichoderma guizhouense* modulates  
2 *Arabidopsis* root development through auxin transport and signaling

3 **Running title:** Fungal cedrene reprograms root architecture

4 **One-sentence Summary:** Cedrene, a high- abundance sesquiterpenes produced by  
5 plant beneficial *Trichoderma guizhouense* NJAU 4742, stimulates *Arabidopsis* lateral  
6 root formation and primary root elongation by relying on auxin signaling pathway and  
7 auxin transporter PIN2 and AUX1.

8 **Authors:** Yucong Li<sup>¶</sup>, Jiahui Shao<sup>¶</sup>, Yansong Fu<sup>1</sup>, Yu Chen<sup>1</sup>, Hongzhe Wang<sup>2</sup>,  
9 Zihui Xu<sup>1</sup>, Haichao Feng<sup>1</sup>, Weibing Xun<sup>1</sup>, Yunpeng Liu<sup>3</sup>, Nan Zhang<sup>1</sup>, Qirong Shen<sup>1</sup>,  
10 Wei Xuan<sup>2, †</sup>, Ruifu Zhang<sup>1,3, †</sup>

11 <sup>¶</sup>These authors contributed equally to this work.

12 **Addresses:** <sup>1</sup>Jiangsu Provincial Key Lab for Organic Solid Waste Utilization,  
13 National Engineering Research Center for Organic-based Fertilizers, Jiangsu  
14 Collaborative Innovation Center for Solid Organic Waste Resource Utilization,  
15 Nanjing Agricultural University, Nanjing 210095, China

16 <sup>2</sup>State Key Laboratory of Crop Genetics and Germplasm Enhancement and MOA Key  
17 Laboratory of Plant Nutrition and Fertilization in Lower-Middle Reaches of the  
18 Yangtze River, Nanjing Agricultural University, Nanjing 210095, China

19 <sup>3</sup>Key Laboratory of Microbial Resources Collection and Preservation, Ministry of  
20 Agriculture, Institute of Agricultural Resources and Regional Planning, Chinese  
21 Academy of Agricultural Sciences, Beijing 100081, China

22 **†Corresponding authors:**

23 Ruifu Zhang, [rfzhang@njau.edu.cn](mailto:rfzhang@njau.edu.cn). Tel:86-25-84396477, Fax:86-25-84396260;

24 Wei Xuan, [wexua@njau.edu.cn](mailto:wexua@njau.edu.cn).

25 **Footnotes:**

26 This work was funded by the National Natural Science Foundation of China  
27 (31972512 and 32072665), the Agricultural Science and Technology Innovation  
28 Program of CAAS (No. CAAS-ZDRW202009) and Key R&D Program of Shandong  
29 Province (2019JZZY020614).

30 **Author contributions:**

31 R.Z. planned and designed the research. Y.C.L. performed the experiments and wrote  
32 the manuscript. R.Z. and W.X. polished the manuscript. J.H.S. and Y.S.F. and helped  
33 with root phenotype analysis and imaging. Y.C. and H.Z.W. analyzed the data. All  
34 authors discussed the results. R.Z. and W.X. agree to serve as the authors responsible  
35 for contact and ensure communication.  
36

37 **ABSTRACT**

38 Rhizosphere microorganisms interact with plant roots by producing chemical  
39 signals to regulate root development. However, the involved distinct bioactive  
40 compounds and the signal transduction pathways are remaining to be identified. Here,  
41 we show that sesquiterpenes (SQTs) are the main volatile compounds produced by  
42 plant beneficial *Trichoderma guizhouense* NJAU 4742, inhibition of SQTs synthesis  
43 in this strain indicated their involvement in plant-fungus cross-kingdom signaling.  
44 SQTs component analysis further identified the cedrene, a high abundant SQT in  
45 strain NJAU 4742, could stimulate plant growth and root development. Genetic  
46 analysis and auxin transport inhibition showed that auxin receptor TIR1, AFB2,  
47 auxin-responsive protein IAA14, and transcription factor ARF7, ARF19 affect the  
48 response of lateral roots to cedrene. Moreover, auxin influx carrier AUX1, efflux  
49 carrier PIN2 were also indispensable for cedrene-induced lateral root formation.  
50 Confocal imaging showed that cedrene affected the expression of *pPIN2:PIN2:GFP*  
51 and *pPIN3:PIN3:GFP*, which may be related to the effect of cedrene on root  
52 morphology. These results suggest that a novel SQT molecule from plant beneficial *T.*  
53 *guizhouense* can regulate plant root development through auxin transport and  
54 signaling.

55 **KEY WORDS**

56 sesquiterpenes (SQTs), cedrene, volatile compounds, auxin, lateral root,  
57 *Trichoderma*

58

## 59 INTRODUCTION

60 The periodic formation of lateral roots (LR) is a post-embryonic process that is  
61 regulated by both endogenous and environmental cues (Xie et al., 2019; Li et al.,  
62 2021). Auxin plays the central role in all stages of LR formation, which consists of  
63 LR priming, LR initiation and patterning and LR emergence (Lavenus et al., 2013;  
64 Santos Teixeira and Ten Tusscher, 2019). Following the act of lateral root cap (LRC)  
65 derived auxin on the oscillation zone (OZ), an oscillatory signal is generated to  
66 control xylem pole pericycle cells (XPP) ‘priming’ and pre-branch sites forming  
67 (Xuan et al., 2020). Auxin regulates LR initiation by controlling LR founder cell  
68 divisions and LR founder cell polarity and/or identity acquisition (Dubrovsky et al.,  
69 2008). In the LR emergence stage, auxin induces the expression of cell  
70 wall-remodeling enzymes to promote cell separation, changes the cell turgor pressure  
71 in the outer tissue layers and in the lateral root primordia (LRP), these progresses will  
72 help LRPs to go through three overlaying cell layers (endodermis, cortex, and  
73 epidermis) to emerge as the LR (Neuteboom et al., 1999; Laskowski et al., 2006;  
74 Swarup et al., 2008; Peret et al., 2012; Lee et al., 2013).

75 Environmental factors, which include water, salt, drought, light, nitrate and  
76 phosphate, affect LR formation by interfering with auxin synthesis, conjugation, and  
77 degradation, as well as auxin transport or response (Santos Teixeira and Ten Tusscher,  
78 2019).The rhizosphere, defined as the narrow zone influenced by plant roots and  
79 characterized by their intense association with microbial activity (Mendes et al., 2013;  
80 van Dam and Bouwmeester, 2016), is relatively rich in nutrients, because about 20-40%  
81 of the photosynthetic products can be lost from the root in the form of root exudates,  
82 including ions, oxygen, water, enzymes, mucus and primary and secondary  
83 metabolites (Bais et al., 2006; Philippot et al., 2013; Venturi and Keel, 2016).  
84 Consequently, a large number and variety of microorganisms, including bacteria and  
85 fungi, were inhabited in the rhizosphere. The rhizosphere microorganisms affect root  
86 system architecture (RSA) by the production of phytohormones and secondary  
87 metabolites, such as auxin, cytokinin and 2,4-diacetylphloroglucinol (DAPG), which  
88 interfere with auxin-dependent signaling pathways in plants (Vacheron et al., 2013).

89 Microbes also produce many volatile compounds (VCs) with the ability to reprogram  
90 RSA (Zhang et al., 2007; Kanchiswamy et al., 2015; Werner et al., 2016; Tyc et al.,  
91 2017; Fincheira and Quiroz, 2018), which can evaporate and diffuse easily far from  
92 their original point and migrate in soil and aerial environments for their low molecular  
93 masses and low polarity, and as well as a high vapor pressure (Schulz and Dickschat,  
94 2007; Schmidt et al., 2015). VC component of indole emitted by soil-borne bacteria  
95 affected LR development in *Arabidopsis* through auxin signaling, depend on polar  
96 auxin transport system (Bailly et al., 2014). (-)-Thujopsene, a kind of sesquiterpenes  
97 (SQTs), produced by *Laccaria bicolor*, stimulated LR formation in *Arabidopsis* by  
98 inducing superoxide anion radicals in roots, independent on auxin signaling pathways  
99 (Ditengou et al., 2015). 6-pentyl-2H-pyran-2-one (6-PP) detected in *Trichoderma*  
100 *atroviride* regulated LR development through auxin signaling and transport in the root  
101 system (Garnica-Vergara et al., 2016). The VCs produced by *T. viride* with the main  
102 ingredients of isobutyl alcohol, isopentyl alcohol, and 3-methylbutanal, increased  
103 biomass in the shoot and the root system (Hung et al., 2013). So far, considerable  
104 progress has been made in elucidating the mode of action of VCs; however, it is still  
105 poorly understood, especially in the identification of distinct bioactive compounds.

106 *Trichoderma* species are able to colonize the root surface to promote the root  
107 development and plant growth, which also represent excellent biocontrol agents in  
108 agriculture because of their strong ability to fight with plant pathogens (Druzhinina et  
109 al., 2011). *Trichoderma* species have broad VC profiles (Hung et al., 2013; Muller et  
110 al., 2013), the produced SQTs were supposed to be good candidates for underground  
111 microbe-plant signaling as SQTs were the representative diffusing compounds in  
112 complex environment (Hiltbold and Turlings, 2008). In this study, we identified the  
113 cedrene from *Trichoderma guizhouense* NJAU 4742, the plant beneficial fungus with  
114 efficient promotion for plant growth and root development, as well as the soil-borne  
115 pathogen suppression (Zhang et al., 2016; Meng et al., 2019; Zhang et al., 2019). The  
116 cedrene can enhance shoot and root biomass and stimulate root development in a  
117 dose-dependent manner. Cedrene induced auxin response in primary root tips and  
118 early stages LRP (I-III), but not the late stages LRP (IV-VII). Furthermore, cedrene

119 differentially modulated expression of auxin transporters PIN1, PIN2, PIN3 and PIN7.  
120 A genetic screen for cedrene resistance established that this compound required auxin  
121 receptors TIR1 and AFB2, and downstream auxin-responsive protein IAA14, and  
122 transcription factors ARF7 and ARF19 to stimulate lateral root development.  
123 Moreover, auxin influx carrier AUX1 and efflux carrier PIN2 were both indispensable  
124 for promoting lateral root formation.  
125  
126

127 **RESULTS**

128 **VCs released by *T. guizhouense* NJAU 4742 promote *Arabidopsis* growth and**  
129 **root development**

130 *Arabidopsis* plants were grown in the presence of fungal VCs in  
131 bi-compartmented Petri dishes (Fig. 1a). After 8 d of co-cultivation, despite the  
132 absence of direct contact with *T. guizhouense* NJAU 4742, strong stimulation of  
133 growth and root development was observed in *Arabidopsis*, which should have been  
134 caused by VCs of NJAU 4742. *T. guizhouense* VCs slightly promoted primary root  
135 elongation, but significantly increased the lateral root number and lateral root density  
136 by 37% and 39%, respectively (Fig.1a-c). In addition, *T. guizhouense* VCs can also  
137 increase the root and shoot biomass by 101% and 56% (Fig.1e, f), respectively, and  
138 increase the total biomass production of plants by 71% (Fig.1g).

139 **Cedrene mimics fungal VCs effects in promoting LR formation**

140 To identify the VCs component responsible for LR induction, VCs of *T.*  
141 *guizhouense* NJAU 4742 in the headspace was measured by SPME-GC-MS. Table 1  
142 shows that sesquiterpenes (SQTs) are the major compounds within the VC profile  
143 (75.93%) from *T. guizhouense* NJAU 4742. Previous studies have shown that SQTs  
144 from ectomycorrhizal fungi *Laccaria bicolor* can reprogramme root architecture  
145 (Ditengou et al., 2015). To test whether SQTs in *T. guizhouense* VCs are related to the  
146 induction of lateral root formation, we inhibited SQT biosynthesis using inhibitor  
147 lovastatin (Rodriguez-Concepcion, 2006; Ditengou et al., 2015) in *T. guizhouense*  
148 NJAU 4742 and investigated the effect on LR stimulation in *Arabidopsis*. The result  
149 showed that the effect of *T. guizhouense* VCs on promoting root development was  
150 abolished when fungal SQTs were suppressed by lovastatin (Fig. 2a-c). To identify  
151 distinct bioactive compounds, we tested the effect of a pure product (cedrene) that can  
152 be obtained and contained in a large amount in *T. guizhouense* VCs profile on the  
153 plant growth-promoting activity. The *Arabidopsis* seedlings were treated with DMSO  
154 (as control) or with 10-2000  $\mu$ M cedrene dissolved in DMSO (Fig. 3a). After 8 d of  
155 growth in medium supplied with 20-100  $\mu$ M cedrene, a significant increase in shoot,  
156 root and total plant biomass was observed (Fig. 3b-d). By contrast, the higher

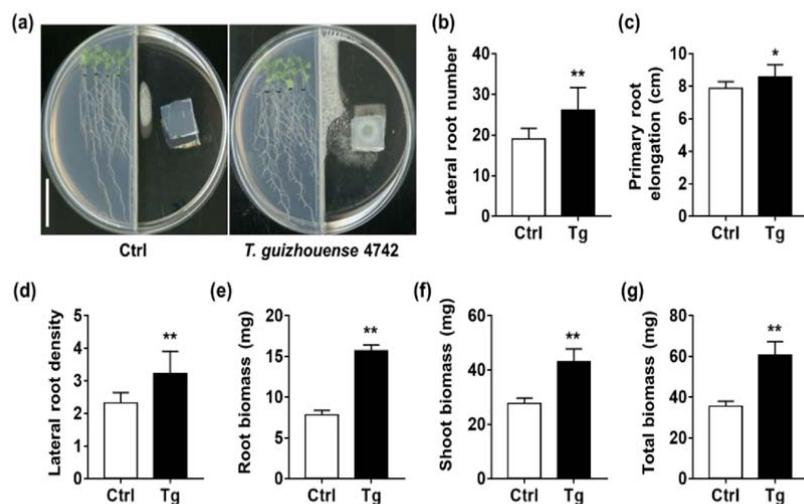

**Figure 1.** Effect of *Trichoderma guizhouense* NJAU 4742 volatile compounds on *Arabidopsis* biomass production and root development. (a) Three-day-old *Arabidopsis thaliana* (Col-0) seedlings were germinated and grown for 8 d in the presence of *T. guizhouense* NJAU 4742 in a bi-compartmented Petri dish avoiding direct contact and solute exchange between the plant and the fungus. Scale bar, 2 cm. (b and c) Quantification of primary root elongation (b) and number of emerged lateral roots (c). n = 12. \*\*, P < 0.01; \*, P < 0.05 (Student's *t*-test). (d) Lateral root density (number of emerged lateral roots cm<sup>-1</sup>). n = 12. \*\*, P < 0.01; \*, P < 0.05 (Student's *t*-test). (e-g) Quantification of root biomass (e), shoot biomass (f) and total biomass (g) production per *Arabidopsis* seedling. n = 12. \*\*, P < 0.01; \*, P < 0.05 (Student's *t*-test). Error bars indicate  $\pm$  SD of the mean.



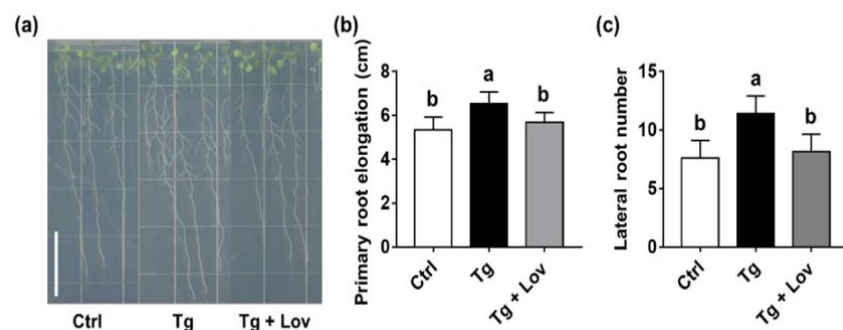

**Figure 2.** Sesquiterpenes in *Trichoderma guizhouense* NJAU 4742 volatile compounds are the main bioactive compounds for inducing *Arabidopsis* root development. (a) Three-day-old *Arabidopsis* seedlings were grown for 7 d in bi-compartmented Petri dishes (10cm × 10cm), which was inoculated with *T. guizhouense* (Tg) in the presence or absence of Lov (10  $\mu$ M) in the adjacent compartment. Scale bar, 2 cm. (b and c) Quantification of primary root elongation (b) and emerged lateral roots number of plants shown in (a). Different letters indicate significant differences of the mean values at  $P < 0.05$  (One-way ANOVA,  $n = 12$ ). Error bars indicate  $\pm$  SD of the mean.

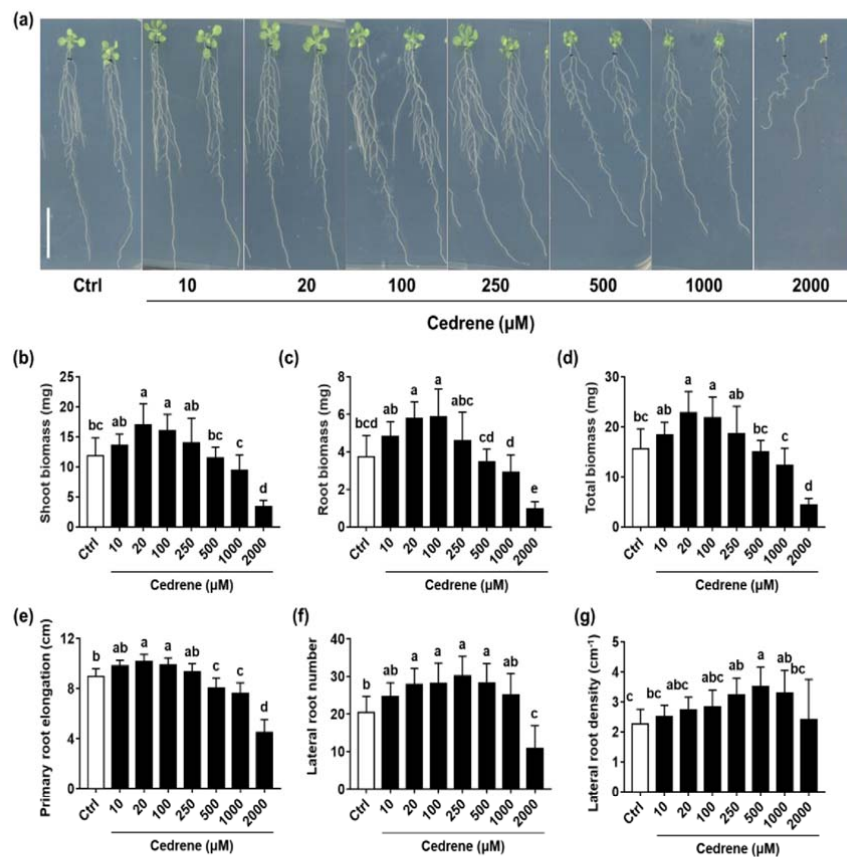

**Figure 3.** Effect of cedrene on *Arabidopsis* biomass production and root development.

(a) Representative photographs of *Arabidopsis* seedlings grown for 8 d in 1/2 MS salts agar medium supplied with the solvent (DMSO) or increasing concentrations of cedrene. Scale bar, 2 cm. (b-d) Quantification of shoot biomass (b), root biomass (c), and total biomass (d) per seedling of plants shown in (a). Different letters indicate significant differences of the mean values at  $P < 0.05$  (One-way ANOVA,  $n = 12$ ). (e-g) Quantification of primary root elongation (e), emerged lateral roots number (f), and lateral root density (g, number of emerged lateral roots  $\text{cm}^{-1}$ ) of plants shown in (a). Different letters indicate significant differences of the mean values at  $P < 0.05$  (One-way ANOVA,  $n = 12$ ). Error bars indicate  $\pm$  SD of the mean.

160 (20-500  $\mu$ M) and lower concentration (20-100  $\mu$ M) of cedrene could induce the  
161 increase of lateral root number and primary root elongation, respectively (Fig. 3e, f),  
162 but higher concentration cedrene would have no or even inhibitory effect on that (Fig.  
163 3e, f). Moreover, the cedrene treatments increased lateral root density in a  
164 dose-dependent manner (Fig. 3g).

#### 165 **Cedrene affects early LRP stages to induce lateral root formation**

166 To further investigate the stage of LRP that is impacted by cedrene treatment, the  
167 developmental stage of LRP in the newly formed PR of control and cedrene-treated  
168 plants were quantified. Cedrene induced more LRP formation at very early stages  
169 (Stages I) compared with control treatment (Fig. 4c). However, we did not observe  
170 changes on later stages LRP (from Stage II to Stage VII) in cedrene-treated seedling  
171 roots (Fig. 4c). It is noteworthy that cedrene treatment did not affect the total LRP  
172 number (Fig. 4c). Next, we analyzed auxin distribution using the *pDR5:GUS* reporter  
173 and an enhanced DR5-directed GUS activity was detected in early stages (Stages I to  
174 III) LRP and meristematic protoxylem pole (Fig. 4a, b). Moreover, a strong and  
175 diffuse increase of *GUS* activity in primary root of auxin-inducible LRP specific  
176 marker line *pGATA23:nls-GUS* (De Rybel et al., 2010) was observed when treated  
177 with cedrene (Fig. 4d). Together, these results demonstrated that cedrene might  
178 stimulate early lateral roots initiation and following LRP development by affecting  
179 auxin distribution and its downstream signaling.

#### 180 **Cedrene does not alter DR5 oscillation in roots**

181 In order to investigate whether cedrene is involved in the regulation of ‘lateral  
182 root clock’, which generates an oscillatory signal that is translated into a  
183 developmental cue to specify a set of founder cells for LR formation (Xuan *et al.*,  
184 2020), we used *pDR5:LUC* (Fig. 5a), which fused *DR5* promoter to the *luciferase*  
185 (*LUC*) gene to mark early LR founder cell positions and allow visualization of its  
186 behavior *in vivo* (Moreno-Risueno et al., 2010; Van Norman et al., 2013; Laskowski  
187 and Ten Tusscher, 2017; Xuan et al., 2020). Expression of *pDR5:LUC* in the root tip  
188 showed oscillatory activity, and a static point of expression, which is the future site of  
189 LRP and LR and therefore is called as prebranch sites (Moreno-Risueno *et al.*, 2010;

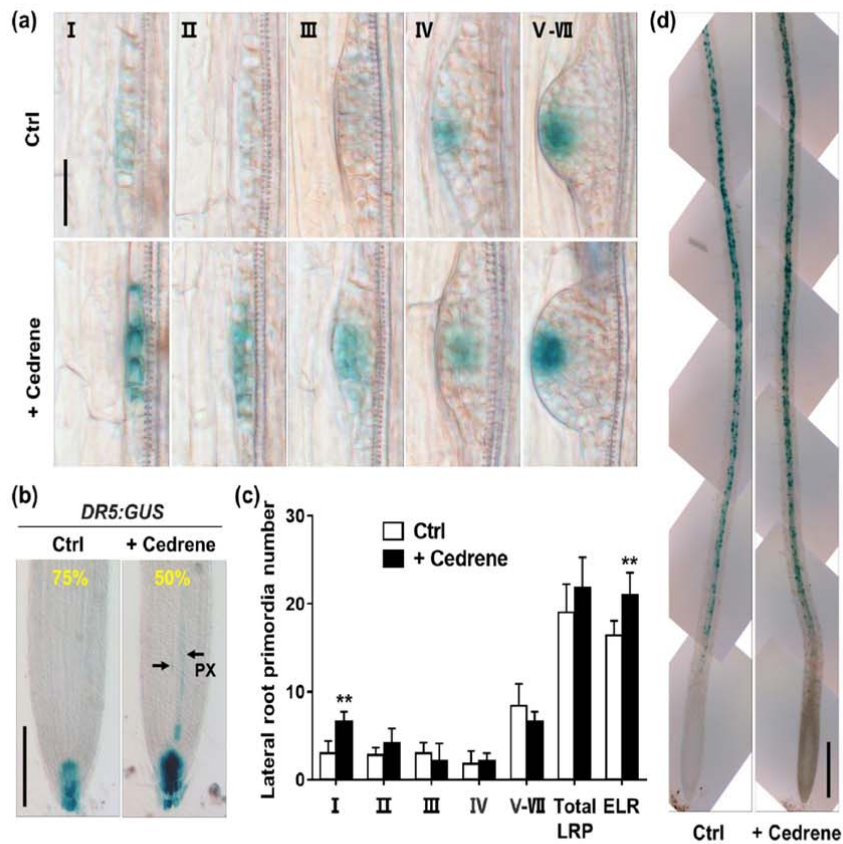

**Figure 4.** The effects of cedrene on lateral root primordium development in *Arabidopsis*. (a) Different stages of lateral root primordia expressing *pDR5:GUS* under solvent (DMSO, Ctrl) or 100  $\mu$ M cedrene-treated conditions. Scale bar, 100  $\mu$ m. (b) Expression pattern of *DR5:GUS* in the root tips of 3-day-old seedling treated with or without cedrene for six more days. Percentages indicate the proportion of seedlings showing the identical *DR5* expression pattern within a population (n = 12). PX, protoxylem pole. Scale bar, 100  $\mu$ m. (c) Distribution of lateral root primordia (LRP) in seven developmental classes as defined by the *pCYCB1;1:GUS* activity after treatment with 100  $\mu$ M cedrene for 7 more days. n = 8. \*\*, P < 0.01; \*, P < 0.05 (Student's *t*-test). Total LRP, total number of lateral root primordia including all seven developmental stages. ELR, emerged lateral roots. (d) *pGATA23:nls-GUS* expression in primary root under control and cedrene-treated (100  $\mu$ M) conditions. Scale bar, 200  $\mu$ m.

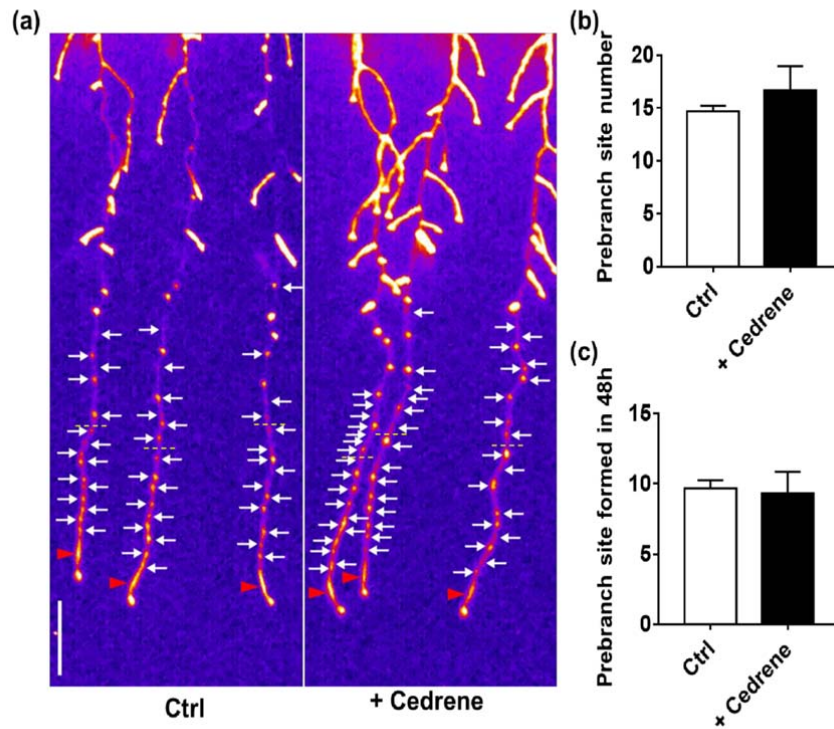

**Figure 5.** The effects of cedrene on prebranch site formation and *DR5* oscillation. (a and b) Luciferase imaging and quantification of prebranch site number of 3-day-old *pDR5:Luciferase* seedlings grown for 6d on medium supplied with or without 100  $\mu$ M cedrene. The prebranch site in the newly formed primary root after transfer was measured. The red triangle indicates *pDR5:Luciferase* signal in the OZ, and white arrow indicates prebranch site revealed by persistent *pDR5:Luciferase* signal. Yellow dotted line indicates the position of root tip after 4 d co-cultivation. Scale bar, 1 cm. (c) Quantification of prebranch site number of *pDR5:Luciferase* seedlings within 48 h under control and cedrene-treated (100  $\mu$ M) conditions.  $n \geq 10$ . \*\*,  $P < 0.01$ ; \*,  $P < 0.05$  (Student's *t*-test). Error bars indicate  $\pm$  SD of the mean.

192 treatment comparing with control treatment (Fig. 5b), which is in accordance with the  
193 observation of total LRP number under cedrene treatment (Fig. 4c). Since the  
194 periodicity and signal intensity of *DR5* oscillation are two important factors required  
195 for prebranch site formation, we further examined the effects of cedrene on those. We  
196 measured the periodic production of the prebranch sites in 48 h and found that  
197 cedrene treatment did not affect the formation of prebranch sites (Fig. 5c), indicating  
198 the periodicity of *DR5* oscillation remain unchanged between control and cedrene  
199 treatments. Also, we did not observed a change in the expression intensity of the *DR5*  
200 in OZ for plants grown in the presence of cedrene (Fig. 5a). Therefore, cedrene  
201 induces LR formation is not through affecting *DR5* oscillation.

#### 202 **Effect of cedrene on root development of auxin-related *Arabidopsis* mutants**

203         Since cedrene can enhance the auxin response of early LRP, implying that  
204 auxin plays a role in cedrene-induced lateral roots formation, we further analyzed the  
205 response of wild-type (Col-0) and *Arabidopsis* mutants deficiented in genes related to  
206 auxin transport or response (*tir1afb2*, *slr-1/iaa14*, *arf7arf19*, *aux1-7*, *pin2*, *pin3*) to  
207 cedrene treatments (Fig. 6a). Col-0 and mutant lines were grown in medium  
208 supplemented with the solvent only or with 100  $\mu$ M cedrene, and LR formation were  
209 analyzed after 8 d treatment. The results showed that in all these auxin signaling  
210 mutants, including *tir1afb2*, in which oscillation amplitude and prebranch site are  
211 drastically compromised (Xuan et al., 2015), *arf7arf19* and *slr-1/iaa14*, which  
212 completely abolished LR formation (Fukaki et al., 2002; Okushima et al., 2007),  
213 cedrene treatment did not influence LR formation and primary root elongation as  
214 compared with the control treatment (Fig. 6b, c). Moreover, the LR formation and  
215 primary root elongation promoting effect of cedrene on the auxin influx mutant  
216 *aux1-7* and auxin efflux mutant *pin2* were also disappeared (Fig. 6b, c). By contrast,  
217 the promoting effects of cedrene on LR formation and primary root elongation were  
218 not affected in the auxin efflux mutant *pin3*. These results suggested that  
219 cedrene-triggered LR formation and primary root elongation operates via a canonical  
220 auxin-response pathway and auxin transport system is necessary for that.

221         To further address the role of polar auxin transport in cedrene-mediated LR

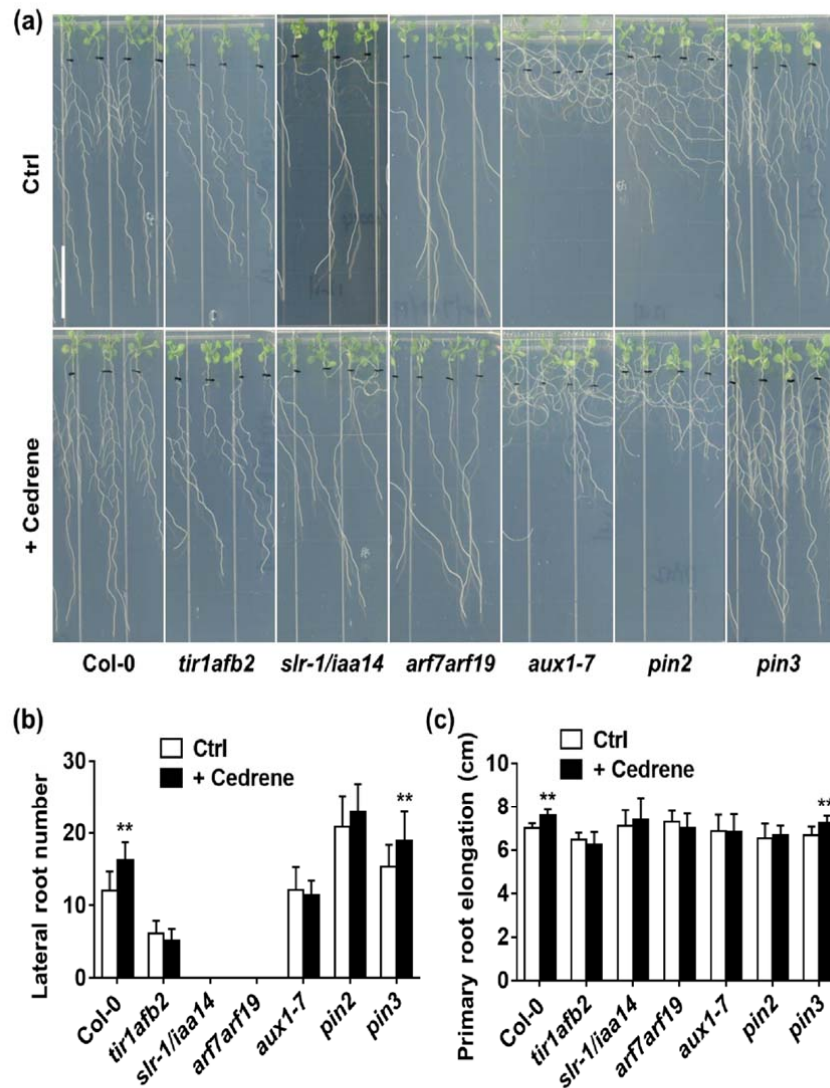

**Figure 6.** Influence of auxin signaling and transport on root system architecture modified by cedrene. (a) Representative photographs of wild-type (Col-0) and mutant seedlings of auxin signaling (*tir1afb2*, *slr-1/iaa14* and *arf7arf19*) and transport (*aux1-7*, *pin2* and *pin3*) under control and cedrene (100 μM) treatments for 8 d. Scale bar, 2 cm. (b and c) Quantification of emerged lateral root number (b) and primary root elongation (c) of plants shown in (a). n = 12. \*\*, P < 0.01; \*, P < 0.05 (Student's t-test). Error bars indicate ± SD of the mean.

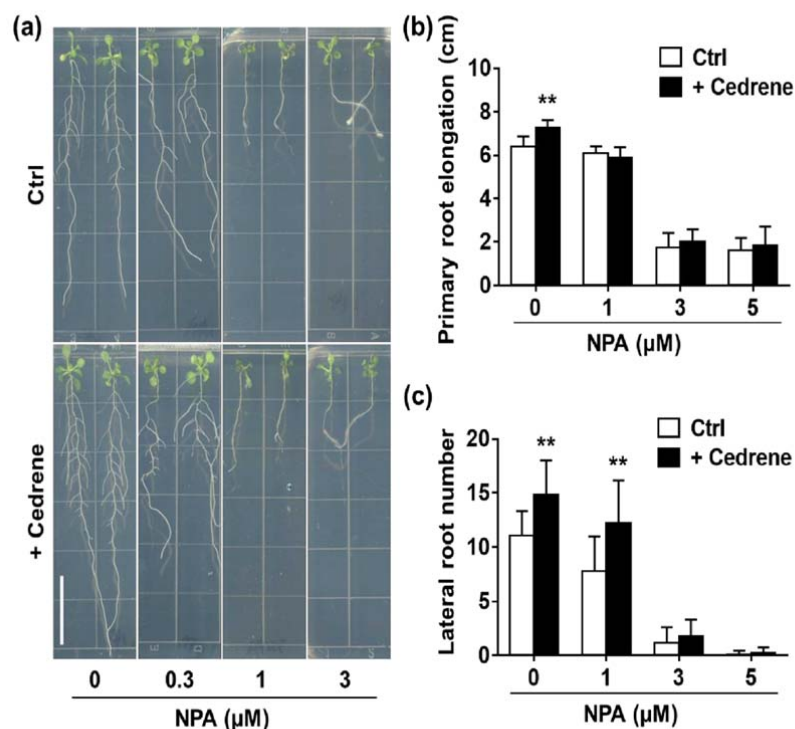

**Figure 7.** Effects of the polar auxin transport inhibitor NPA on cedrene-induced primary root elongation and LR formation. (a) Representative photographs of Arabidopsis seedlings grown under solvent (Ctrl) and cedrene (100  $\mu\text{M}$ ) treatments in presence of varying concentrations of NPA. Scale bar, 2 cm. (b and c) Quantification of emerged lateral root number (c) and primary root elongation (b) of plants shown in (a).  $n = 12$ . \*\*,  $P < 0.01$ ; \*,  $P < 0.05$  (Two-way ANOVA). Error bars indicate  $\pm$  SD of the mean.



224 conditions (Fig. 7a). At 1  $\mu$ M NPA, the ability of cedrene to stimulate LR formation  
225 was basically unaffected, whereas in the presence of 3 and 5  $\mu$ M NPA, LR formation  
226 in response to cedrene was completely abolished (Fig. 7c). Moreover, the stimulation  
227 effect of cedrene on primary root elongation was completely abolished in the presence  
228 of NPA (Fig. 7b). Thus, it can be concluded that a functional auxin efflux machinery  
229 is required for cedrene-induced LR formation.

230 Since the polar auxin transport is mediated by polarly localized PIN proteins  
231 (van Berkel et al., 2013), we analyzed the expression pattern of PIN1, PIN2, PIN3 and  
232 PIN7 in primary root tips of seedlings expressing *pPIN1:PIN1:GFP*,  
233 *pPIN2:PIN2:GFP*, *pPIN3:PIN3: GFP* and *pPIN7:PIN7:GFP* (Fig. 8a-d), to test  
234 whether cedrene could regulate LR formation and/or primary root elongation through  
235 differential expression of the PINs family of auxin transporters. The results showed  
236 that the expression of *pPIN1:PIN1:GFP*, which was only detected in the stele of  
237 primary roots under control condition, and *pPIN7:PIN7:GFP*, which was detected in  
238 the stele and columella of primary roots under control condition, were not affected by  
239 cedrene treatment (Fig. 8a, e, d, h). By contrast, the expression of *pPIN2:PIN2:GFP*,  
240 which was detected in the cortex and epidermal cells under control condition, was  
241 significantly increased when treated with cedrene (Fig. 8b, f). Furthermore, the  
242 expression of *pPIN3:PIN3: GFP*, which was detected in the stele and columella of  
243 primary roots under control condition, displayed a weak expression in the stele when  
244 treated with cedrene (Fig. 8c, g). These findings suggest that cedrene affects the  
245 expression and distribution of the PIN proteins in primary roots and the root response  
246 to cedrene does not occur in all tissues, but shows a clear preference for specific  
247 tissues and transport components.

## 248 **DISCUSSION**

249 Previous studies on rhizosphere microbe's beneficial function usually  
250 emphasized the first step of rhizospheric colonization, resulting in a direct contact  
251 with the root (Bais et al., 2004; Beauregard et al., 2013). However, volatile  
252 compounds (VCs) produced by microbes can spread to distant places through the air,  
253 porous soil, and liquid environment, so it should be an ideal signal substance to

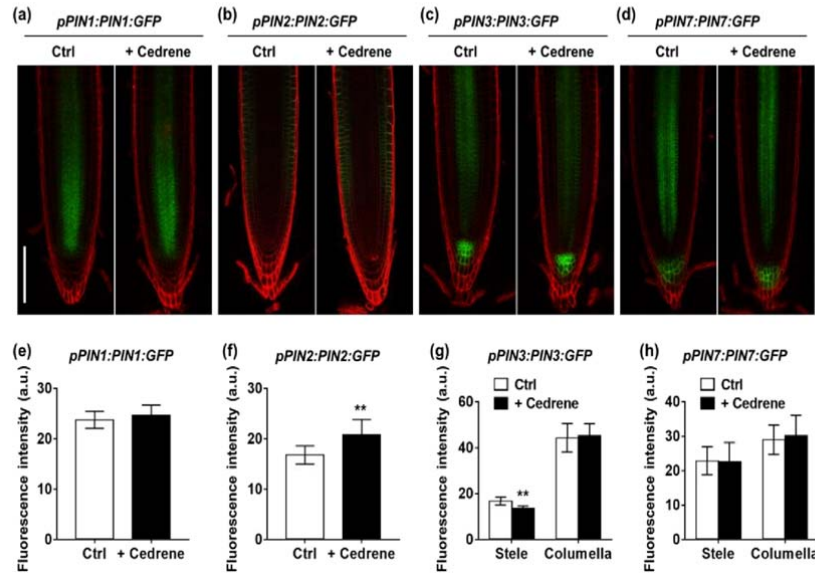

**Figure 8.** Expression of auxin efflux transporters in response to cedrene in primary roots. (a-d) Confocal images of *pPIN1:PIN1:GFP* (a), *pPIN2:PIN2:GFP* (b), *pPIN3:PIN3:GFP* (c) and *pPIN7:PIN7:GFP* (d) signal in the primary root tips of 3-day-old seedlings grown with or without cedrene for 6 d. The seedlings were stained with propidium iodide and analyzed by confocal microscopy. Scale bar, 100  $\mu$ m. (e-h) Quantification of *pPIN1:PIN1:GFP* (e), *pPIN2:PIN2:GFP* (f), *pPIN3:PIN3:GFP* (g) and *pPIN7:PIN7:GFP* (g) signal intensity at primary root tip shown in (a-d). a.u., arbitrary units.  $n \geq 8$ . \*\*,  $P < 0.01$ ; \*,  $P < 0.05$  (Student's *t*-test). Error bars indicate  $\pm$  SD of the mean.

255 a comparative analysis of experimental data has shown that volatile metabolites made  
256 an enormous contribution to the microbial interactions than non-volatile ones  
257 (Tirranen and Gitelson, 2006). Our results clearly demonstrated that the exchange of  
258 molecules between *T. guizhouense* and *Arabidopsis* via intimate contact is not  
259 necessary (Fig.1a), and *T. guizhouense* VCs can act as signals to modulate plant  
260 growth and development.

261 Actually, it is well recognized that plant-associated microorganisms produce a  
262 large number of VCs, which have the potential to play an important role in mediating  
263 the interaction between plants and microbes (Kanchiswamy et al., 2015; Piechulla et  
264 al., 2017; Fincheira and Quiroz, 2018). So far, most of the effects mediated by  
265 microbial VCs have been obtained through co-culture experiments, that is, plants are  
266 exposed to complex mixtures of inorganic and organic volatiles released by  
267 microorganisms. This makes it difficult to disentangle the functions of individual  
268 compounds. On the other hand, the substrate availability and metabolic activities of  
269 the microorganisms also will affect the composition of microbial blends to a large  
270 extent (Fiddaman and Rossall, 1994). Regarding plants, the observation results  
271 obtained by different co-culture experiments vary greatly from strong growth  
272 inhibition to significant growth promotion (Splivallo et al., 2007; Li et al., 2021). In  
273 order to confirm and provide functional evidence for the microbial VCs action  
274 potential, it is necessary to identify distinct biologically active compounds and test  
275 them separately or in prescribed mixtures (Piechulla et al., 2017). Here, we discovered  
276 cedrene, a high-abundant SQT in the emission profile of *T. guizhouense* NJAU 4742,  
277 was sufficient to stimulate LR formation. Cedrene was previously identified in  
278 ascomycete *Muscodor albus*, and has the potential to kill a broad range of plant- and  
279 human-pathogenic fungi and bacteria synergistically with other sesquiterpenes  
280 volatiles (Strobel et al., 2001). Its function as a signaling compound in root branching  
281 as demonstrated in this study, has not been reported before. This evidence is closely  
282 related to the results previously reported by Ditengou et al. (2015) that (-)-thujopsene,  
283 as a low-abundant SQT, can also stimulate lateral root formation. Nevertheless, not all  
284 SQTs can induce lateral roots (Ditengou et al., 2015), indicating that the plant

285 response to these chemicals is specific. Furthermore, along with other environmental  
286 factors, such as water, temperature and light, various distinct bioactive microbial  
287 volatiles that can affect root system architecture have been identified in bacteria and  
288 fungi (Bailly et al., 2014; Ditengou et al., 2015; Garnica-Vergara et al., 2016;  
289 Perez-Flores et al., 2017), emphasizing the high plasticity of plant roots in response to  
290 heterogeneous macro- and micro-conditions.

291 The phytohormone auxin fulfils multiple roles throughout LR development (Du  
292 and Scheres, 2018). Tryptophan treatment initiated additional LRPs were mostly  
293 originated from the auxin-producing pericycle sectors, suggesting that a local auxin  
294 input is able to specify lateral root founder cells (LRFCs) (Dubrovsky et al., 2008). In  
295 this study, an enhanced expression of *DR5*, which is an established marker for auxin  
296 response and indirectly for auxin accumulation (Ulmasov et al., 1997; Sabatini et al.,  
297 1999), was observed at early stages (I-III) LRPs and in the columella and  
298 meristematic protoxylem pole of root tip under cedrene treatment (Fig. 4a and b).  
299 These results suggest that cedrene promotes the formation of early stage LRP by  
300 regulating auxin homeostasis in LRPs. Before LRP initiation, the cell files of the  
301 xylem pole pericycle (XPP) at one side of the root will be specified and activated to  
302 form LRFCs, so that to regulate the spatial distribution of LRPs (Van Norman et al.,  
303 2013; Du and Scheres, 2018). The auxin-regulatory GATA23 transcription factor is  
304 considered as the first molecular marker for specification of LRFCs (De Rybel et al.,  
305 2010). Using a GATA23 RNAi line, in which the expression of GATA23 was reduced  
306 to about 30% of normal levels, a strong reduction in the number of stage I-II  
307 primordia and an overall decrease in the number of emerged primordia was observed.  
308 In contrast, overexpression of GATA23 resulted in a strong increase of stage I and II  
309 primordia (De Rybel et al., 2010). This result is basically consistent with our data,  
310 cedrene treatment enhanced the expression of GATA23 in root and increased the  
311 number of very early stage LRPs (stage I) and ELR, although the total number of LRP  
312 was not affected by cedrene treatment (Fig. 4b-d). These results imply that cedrene  
313 may stimulate the initiation of LRP by controlling founder cell identity of XPP cells  
314 via enhancing GATA23 expression. SOLITARY-ROOT (SLR)/IAA14-ARF7/ARF19

315 module is an important auxin signal component for LR initiation, in which  
316 auxin-induced degradation of unstable SLR protein that de-repressed ARF7 and  
317 ARF19 transcription factors, thus activating downstream gene expression (Fukaki et  
318 al., 2002; Fukaki et al., 2005; Okushima et al., 2005). Our results showed cedrene  
319 treatment could not rescue the lack of LRs in *slr-1/iaa14* and *arf7arf19* mutants and  
320 failed to induce LRs formation in the auxin perception double mutant *tir1afb2* (Fig. 6a,  
321 b). These results suggest that canonical auxin-response pathway is indispensable for  
322 cedrene induced lateral root formation.

323 In plants, auxin is generally transported by two types of carriers (i.e. influx  
324 carriers and efflux carriers). So far, some transmembrane proteins, such as  
325 AUX1/LIKE AUX1 (AUX1/LAX) family, with specific auxin influx functions have  
326 been described in *Arabidopsis* (Bennett et al., 1996; Marchant et al., 2002; Swarup et  
327 al., 2008). For auxin efflux, PIN protein family and ATP-binding cassette subfamily B  
328 (ABCB)-type transporters of the multidrug resistance/phosphoglycoprotein  
329 (ABCB/MDR/PGP) protein family have been identified to play the roles (Galweiler et  
330 al., 1998; Noh et al., 2001). Both auxin influx and efflux carriers can affect the  
331 formation of lateral roots (Marchant *et al.*, 2002; Swarup *et al.*, 2008; Peret *et al.*,  
332 2013). The LR reprogram ability of VCs produced by microbes does not only  
333 influence auxin signaling but also its transport through the root system. In *T.*  
334 *atroviride*, 6-PP enhanced the expression of the auxin transporters PIN1, 2 and 3 in  
335 the primary root of *Arabidopsis* (Garnica-Vergara et al., 2016). In *F. oxysporum*, the  
336 enhanced LR formation by VCs is abolished in auxin transport mutants (Bitas et al.,  
337 2015). Moreover, stimulation of LR in *Arabidopsis* by the ectomycorrhizal fungus *L.*  
338 *bicolor* requires PIN2-mediated auxin transport (Felten et al., 2009). Consistent with  
339 these observations, treatment with the polar auxin transport inhibitor NPA  
340 compromised the ability of cedrene to promote LR formation, suggesting that cedrene  
341 is subjected to polar transport. Furthermore, stimulation of LR formation by cedrene  
342 was completely abolished in mutant *aux1-7*, suggesting that cedrene-triggered LR  
343 formation also requires a complete auxin influx system.

344 The cedrene-induced LR formation and primary root elongation shown here

345 opens new avenues for biotechnological application of microbial VCs, and  
346 demonstrates clearly that the operation of distinct bioactive microbial VCs is a  
347 practical tool to decode the underlying cellular and molecular reactions and  
348 mechanism occurring in microbial VC-mediated interactions. Understanding those  
349 mechanisms will be a prerequisite for the development of strategies for applying  
350 microbial VCs in plant growth in the future.

351

## 352 **MATERIALS AND METHODS**

### 353 **Plant materials and growth conditions**

354 *Arabidopsis thaliana* accessions Col-0 is the wild-type genotype. The marker  
355 lines *pDR5:GUS* (Ulmasov et al., 1997), *pDR5:Luciferase* (Moreno-Risueno et al.,  
356 2010), *pCYCB1;1:GUS* (Himanen et al., 2002), *pGATA23:nls-GUS* (De Rybel et al.,  
357 2010), *pPIN1:PIN1:GFP* (Benkova et al., 2003), *pPIN2:PIN2:GFP* (Blilou et al.,  
358 2005), *pPIN3:PIN3:GFP* (Zadnikova et al., 2010), *pPIN7:PIN7:GFP* (Blilou et al.,  
359 2005) and the mutant lines *tir1afb2* (Dharmasiri et al., 2005), *slr-1/iaa14* (Fukaki et  
360 al., 2002), *arf7arf19* (Okushima et al., 2007), *aux1-7* (Pickett et al., 1990), *pin2*  
361 (Roman et al., 1995), *pin3* (*salk\_005544*) were used in this study. After 2-3 d of  
362 stratification at 4°C in the dark, *Arabidopsis* seeds were surface-sterilized with 30%  
363 (v/v) NaClO solution for 10 min. The seeds were germinated and grown on agar  
364 plates containing Murashige and Skoog Basal Salts Mixture (MS salts, PhytoTech  
365 LABS) in square Petri plates (10 ×10 cm). Standard growth medium consisted of 0.5  
366 × MS salts (2.15 g l<sup>-1</sup>), 0.1 g l<sup>-1</sup> Myo-inositol, 0.5 g l<sup>-1</sup> 2-(N-morpholino) ethanesulfonic  
367 acid (MES), 1% sucrose (pH 5.7), and 1% Agar (Solarbio). Plants were vertically  
368 placed at an angle of 65° in a plant growth chamber, under a long-day photoperiod (16  
369 h: 8 h, light: dark), with a light intensity of 100 μmol m<sup>-2</sup> s<sup>-1</sup>, at 22 °C. After 3 d of  
370 growth, the seedlings were applied for further experiments.

### 371 **Growth of *T. guizhouense* NJAU 4742 and co-cultivation with plants**

372 For experiments involving fungal VCs, bi-compartmented Petri dishes (9 cm  
373 diameter) were used. One of the compartments was filled with MS salts agar medium,  
374 and the other one was placed with a patch of MS salts agar medium (1.5 cm×1.5 cm)

375 incubated with 3 ul *T. guizhouense* NJAU 4742 (maintained in the Jiangsu Provincial  
376 Key Lab for Organic Solid Waste Utilization, China) spores solution. After 3-4 d of  
377 fungal growth at 28°C, 3-day-old seedlings (4 plants) were transferred to the  
378 compartment filled with MS salts agar. The plates were sealed with breathable tape  
379 (MBT, a pressure-sensitive adhesive type usually used in medicine) and incubated for  
380 8 d in a growth chamber at 22°C. At the end of this period, primary root length, lateral  
381 root number, and biomass production were recorded.

### 382 **Analysis of *T. guizhouense* NJAU 4742 VCs**

383 *T. guizhouense* NJAU 4742 was grown in a head-space bottle containing MS  
384 salts agar medium for 6 d at 28 °C. At a constant temperature of 40°C, the head-space  
385 bottle was shaken for 60 min at a shaking speed of 450 rpm (5s on and 2s off). Then  
386 solid-phase microextraction (SPME) fiber (50/30 µm DVB/CAR on PDMS) was  
387 inserted into the headspace of the sample, and the sample was extracted in the  
388 headspace for 60 min. The SPME fiber was removed and desorbed at 250°C for 5min,  
389 and then was separated and identified by gas chromatography-mass spectrometry  
390 (GC-MS). GC-MS analysis was carried out by Agilent 7890B-5977B (GC-MS)\_PAL  
391 RSI 120, equipped with a chromatographic column (Agilent DB-wax,  
392 30m×0.25mm×0.25µm). Helium (> 99.999%) was used as the carrier gas (1.0  
393 ml/min), and the injection temperature was 260 °C. The column was held at 40 °C for  
394 3 min and then was programmed to increase by 4 °C per min to a final temperature of  
395 220 °C, which was maintained for 10 min. The interface temperature, ion source  
396 temperature and quadrupole temperature was 280 °C, 230 °C and 150 °C respectively;  
397 the ionization mode was EI<sup>+</sup>, 70ev; the detector voltage was 901V; the scanning mode  
398 was full-scan, and the mass range was 20-650 (m/z). These compounds were  
399 identified by comparison with mass spectra from a library of NIST  
400 (<https://webbook.nist.gov/chemistry/>). The identification of cedrene was performed by  
401 comparing retention time (Rt) and the mass spectra from an authentic standard  
402 ((-)- $\alpha$ -cedrene, Sigma-Aldrich) with those obtained in the sample.

### 403 **Chemical preparation and treatments**

404 1-N-naphthylphthalamic acid (NPA) and (-)- $\alpha$ -cedrene ( $\geq$  95%, Sigma-Aldrich)

405 were dissolved in DMSO to make a 50 mM and 200 mM stock solution, respectively.  
406 For treatment, the required amount of the stock solutions was added into MS salts  
407 agar and mixed in uniform before being poured into Petri dishes. For lovastatin  
408 treatment, lovastatin (PHR1285, Supelco), was dissolved in ethanol to make a 100  
409 mM stock solution, sterile-filtered and added to the MS salts media at the indicated  
410 concentration. The plants and *T. guizhouense* were cultivated in a square  
411 bi-compartment Petri dish (10 cm × 10 cm), in which a small Petri dish (3cm diameter)  
412 was placed to inoculate *T. guizhouense*. *T. guizhouense*, not *Arabidopsis*, grown with  
413 lovastatin. LR formation and primary root length was measured after treatment for 7  
414 days.

#### 415 **Phenotypic data analysis**

416 After co-cultivation with fungus or with cedrene for an indicated time period, the  
417 length of the newly elongated PR during the treatment was quantified and the  
418 emerged LRs in the whole PR were counted. The plates with seedlings were scanned  
419 using EPSON XL11000 for the measurement of PR elongation with Fiji software  
420 (<http://fiji.sc/>) and the emerged LRs were recorded under a microscope. The LR  
421 density was determined by dividing the emerged LR number by the new formed PR  
422 length for each analyzed seedling. The biomass production of each seedling was  
423 measured on an analytical balance. LRPs were quantified 6 d after co-cultivation. The  
424 *pCYCB1;1:GUS* seedlings were stained and cleared to visualize the LRPs at early  
425 stages of development and each LRP developmental stage was classified according to  
426 Malamy and Benfey (1997) as follows. Stage I, LRP initiation, in the longitudinal  
427 plane, approximately 8 to 10 “short” pericycle cells are formed. Stage II, the formed  
428 LRP is divided into two layers by a periclinal division. Stage III, the outer layer of the  
429 primordium is divided periclinally, generating a three-layer primordium. Stage IV,  
430 LRP with four cell layers. Stage V-VII, the midway between the LRP departing from  
431 the parent cortex to the LRP appears to be just about to emerge from the parent root.

#### 432 **GUS histochemical staining**

433 For histochemical analysis of GUS activity, the roots of 3-day-old *pDR5:GUS*,  
434 *pCYCB1;1:GUS* and *pGATA23:nls-GUS* marker lines were incubated overnight at 37 °C



435 in a GUS reaction buffer after 6 d of cedrene treatment. The stained roots were  
436 cleared using the method of Malamy and Benfey (1997). For each marker line and  
437 each treatment, at least 8 transgenic plants were analyzed. A representative sample  
438 was chosen and photographed using Leica DM2500 microscope.

#### 439 **Luciferase assay**

440 *pDR5:Luciferase* expression along the primary root was analyzed by using  
441 Lumazon (Xuan et al., 2018). After 6 d of treatment with cedrene, *pDR5:Luciferase*  
442 plants were sprayed with a 1mM potassium luciferin (Gold Biotechnology) and  
443 reacted for 15 min in darkness, then were imaged immediately with a 15 min  
444 exposure time. For investigating the effects of cedrene on the periodicity of *DR5*  
445 oscillation, the position of root tip was marked after 4 d of co-cultivation and the  
446 prebranch sites formed in the following 2 d was counted. The picture series were  
447 saved as TIFF format by IVScopeEQ software for further analysis in Fiji  
448 (<http://fiji.sc/>). The Fiji lookup tables "Fire" was used to convert black and white  
449 images into color scales based on pixel intensity.

#### 450 **Fluorescence microscopy**

451 For confocal microscopy, control or cedrene-treated transgenic *Arabidopsis*  
452 seedlings (*pPIN1:PIN1:GFP*, *pPIN2:PIN2:GFP*, *pPIN3:PIN3:GFP* and  
453 *pPIN7:PIN7:GFP*) were mounted in 10 mg ml<sup>-1</sup> propidium iodide solution on  
454 microscope slides. A Leica SP8 laser-scanning microscope was used for fluorescence  
455 imaging of the *Arabidopsis* roots. Each sample was analyzed separately for propidium  
456 iodide (with a 568-nm wavelength argon laser for excitation, and an emission window  
457 of 585–610 nm) and GFP fluorescence (488 nm excitation/505–550 nm emission).  
458 More than eight independent seedlings were analyzed per line, and treatment  
459 representative images were selected for figure construction.

460

#### 461 **Figure legends**

462 **Figure 1.** Effect of *Trichoderma guizhouense* NJAU 4742 volatile compounds on  
463 *Arabidopsis* biomass production and root development. (a) Three-day-old *Arabidopsis*  
464 *thaliana* (Col-0) seedlings were germinated and grown for 8 d in the presence of *T.*

465 *guizhouense* NJAU 4742 (Tg) in a bi-compartmented Petri dish avoiding direct  
466 contact and solute exchange between the plant and the fungus. Scale bar, 2 cm. (b and  
467 c) Quantification of primary root elongation (b) and number of emerged lateral roots  
468 (c). n = 12. \*\*, P < 0.01; \*, P < 0.05 (Student's *t*-test). (d) Lateral root density  
469 (number of emerged lateral roots cm<sup>-1</sup>). n = 12. \*\*, P < 0.01; \*, P < 0.05 (Student's  
470 *t*-test). (e-g) Quantification of root biomass (e), shoot biomass (f) and total biomass (g)  
471 production per *Arabidopsis* seedling. n = 12. \*\*, P < 0.01; \*, P < 0.05 (Student's  
472 *t*-test). Error bars indicate ± SD of the mean.

473 **Figure 2.** Sesquiterpenes in *Trichoderma guizhouense* NJAU 4742 volatile  
474 compounds are the main bioactive compounds for inducing *Arabidopsis* root  
475 development. (a) Three-day-old *Arabidopsis* seedlings were grown for 7 d in  
476 bi-compartmented Petri dishes (10cm × 10cm), which was inoculated with *T.*  
477 *guizhouense* in the presence (Tg+Lov) or absence (Tg) of 10 μM lovastatin (Lov) in  
478 the adjacent compartment. Scale bar, 2 cm. (b and c) Quantification of primary root  
479 elongation (b) and emerged lateral roots number of plants shown in (a). Different  
480 letters indicate significant differences of the mean values at P < 0.05 (One-way  
481 ANOVA, n = 12). Error bars indicate ± SD of the mean.

482 **Figure 3.** Effect of cedrene on *Arabidopsis* biomass production and root  
483 development. (a) Representative photographs of *Arabidopsis* seedlings grown for 8 d  
484 in 1/2 MS salts agar medium supplied with the solvent (DMSO) or increasing  
485 concentrations of cedrene. Scale bar, 2 cm. (b-d) Quantification of shoot biomass (b),  
486 root biomass (c), and total biomass (d) per seedling of plants shown in (a). Different  
487 letters indicate significant differences of the mean values at P < 0.05 (One-way  
488 ANOVA, n = 12). (e-g) Quantification of primary root elongation (e), emerged lateral  
489 roots number (f), and lateral root density (g, number of emerged lateral roots cm<sup>-1</sup>) of  
490 plants shown in (a). Different letters indicate significant differences of the mean  
491 values at P < 0.05 (One-way ANOVA, n = 12). Error bars indicate ± SD of the mean.

492 **Figure 4.** The effects of cedrene on lateral root primordium development in  
493 *Arabidopsis*. (a) Different stages of lateral root primordia expressing *pDR5:GUS*  
494 under solvent (DMSO, Ctrl) or 100 μM cedrene-treated conditions. Scale bar, 100 μm.

495 (b) Expression pattern of *DR5:GUS* in the root tips of 3-day-old seedling treated with  
496 or without cedrene for six more days. Percentages indicate the proportion of seedlings  
497 showing the identical *DR5* expression pattern within a population (n = 12). PX,  
498 protoxylem pole. Scale bar, 100  $\mu$ m. (c) Distribution of lateral root primordia (LRP)  
499 in seven developmental classes as defined by the *pCYCB1;1:GUS* activity after  
500 treatment with 100  $\mu$ M cedrene for 7 more days. n = 8. \*\*, P < 0.01; \*, P < 0.05  
501 (Student's *t*-test). Total LRP, total number of lateral root primordia including all seven  
502 developmental stages. ELR, emerged lateral roots. (d) *pGATA23:nls-GUS* expression  
503 in primary root under control and cedrene-treated (100  $\mu$ M) conditions. Scale bar, 200  
504  $\mu$ m.

505 **Figure 5.** The effects of cedrene on prebranch site formation and *DR5* oscillation.  
506 (a and b) Luciferase imaging and quantification of prebranch site number of 3-day-old  
507 *pDR5:Luciferase* seedlings grown for 6d on medium supplied with or without 100  $\mu$ M  
508 cedrene. The prebranch site in the newly formed primary root after transfer was  
509 measured. The red triangle indicates *pDR5:Luciferase* signal in the OZ, and white  
510 arrow indicates prebranch site revealed by persistent *pDR5:Luciferase* signal. Yellow  
511 dotted line indicates the position of root tip after 4 d co-cultivation. Scale bar, 1 cm. (c)  
512 Quantification of prebranch site number of *pDR5:Luciferase* seedlings within 48 h  
513 under control and cedrene-treated (100  $\mu$ M) conditions. n  $\geq$  10. \*\*, P < 0.01; \*, P <  
514 0.05 (Student's *t*-test). Error bars indicate  $\pm$  SD of the mean.

515 **Figure 6.** Influence of auxin signaling and transport on root system architecture  
516 modified by cedrene. (a) Representative photographs of wild-type (Col-0) and mutant  
517 seedlings of auxin signaling (*tir1afb2*, *slr-1/iaa14* and *arf7arf19*) and transport  
518 (*aux1-7*, *pin2* and *pin3*) under control and cedrene (100  $\mu$ M) treatments for 8 d. Scale  
519 bar, 2 cm. (b and c) Quantification of emerged lateral root number (b) and primary  
520 root elongation (c) of plants shown in (a). n = 12. \*\*, P < 0.01; \*, P < 0.05 (Student's  
521 *t*-test). Error bars indicate  $\pm$  SD of the mean.

522 **Figure 7.** Effects of the polar auxin transport inhibitor NPA on cedrene-induced  
523 primary root elongation and LR formation. (a) Representative photographs of  
524 *Arabidopsis* seedlings grown under solvent (Ctrl) and cedrene (100  $\mu$ M) treatments in

525 presence of varying concentrations of NPA. Scale bar, 2 cm. (b and c) Quantification  
526 of emerged lateral root number (c) and primary root elongation (b) of plants shown in  
527 (a).  $n = 12$ . \*\*,  $P < 0.01$ ; \*,  $P < 0.05$  (Two-way ANOVA). Error bars indicate  $\pm$  SD of  
528 the mean.

529 **Figure 8.** Expression of auxin efflux transporters in response to cedrene in  
530 primary roots. (a-d) Confocal images of *pPIN1:PIN1:GFP* (a), *pPIN2:PIN2:GFP* (b),  
531 *pPIN3:PIN3:GFP* (c) and *pPIN7:PIN7:GFP* (d) signal in the primary root tips of 3-  
532 day-old seedlings grown with or without cedrene for 6 d. The seedlings were stained  
533 with propidium iodide and analyzed by confocal microscopy. Scale bar, 100  $\mu$ m. (e-h)  
534 Quantification of *pPIN1:PIN1:GFP* (e), *pPIN2:PIN2:GFP* (f), *pPIN3:PIN3:GFP* (g)  
535 and *pPIN7:PIN7:GFP* (h) signal intensity at primary root tip shown in (a-d).  $n \geq 8$ . \*\*,  
536  $P < 0.01$ ; \*,  $P < 0.05$  (Student's *t*-test). Error bars indicate  $\pm$  SD of the mean.

537

538 **Table 1** Volatile compounds produced by *Trichoderma guizhouense* NJAU 4742 after  
 539 6 d of growth in 1/2 MS salts agar medium, analyzed by solid-phase microextraction  
 540 (SPME)- GC-MS

|                | Metabolite name                                           | Normalized amount of volatile compound (%) |
|----------------|-----------------------------------------------------------|--------------------------------------------|
| Sesquiterpenes | 1,4-Cadinadiene                                           | 25.50 ± 4.08                               |
|                | Cedrene                                                   | 17.11 ± 4.29                               |
|                | Dauca-4(11),8-diene                                       | 8.66 ± 2.69                                |
|                | Cis-calamenene                                            | 9.31 ± 4.54                                |
|                | (+)-Cuparene                                              | 4.28 ± 1.76                                |
|                | Copaene                                                   | 3.57 ± 1.54                                |
|                | (+)-Acoradiene                                            | 2.39 ± 0.57                                |
|                | g-Muurolene                                               | 1.89 ± 0.35                                |
|                | 4,9-Cadinadiene                                           | 0.93 ± 0.11                                |
|                | β-Cubebene                                                | 0.74 ± 0.08                                |
|                | Cycloisolongifolene                                       | 0.70 ± 0.34                                |
|                | Aromandendrene                                            | 0.21 ± 0.09                                |
|                | β-Curcumene                                               | 0.19 ± 0.09                                |
| other VCs      | Benzene, 1,4-diethyl-                                     | 17.24 ± 4.29                               |
|                | 3,3-Dimethylphthalide                                     | 1.59 ± 0.86                                |
|                | D-alanine, n-(4-butylbenzoyl)-, isohexyl ester            | 1.05 ± 0.16                                |
|                | 4-hepten-3-one, 5-ethyl-4-methyl-                         | 1.31 ± 0.84                                |
|                | 6,6-dimethyl-2-vinylidenebicyclo[3.1.1]heptane            | 0.94 ± 0.71                                |
|                | Spiro[4.5]dec-6-en-8-one, 1,7-dimethyl-4-(1-methylethyl)- | 0.52 ± 0.26                                |
|                | Benzene, 1-(1,5-dimethylhexyl)-4-methyl-                  | 0.46 ± 0.14                                |
|                | 1-bromo-3,7-dimethyl-2,6-octadiene                        | 0.32 ± 0.13                                |
|                | Spiro[4.5]dec-8-en-7-ol, 4,8-dimethyl-1-(1-methylethyl)-  | 0.26 ± 0.11                                |

541 Normalized amount of volatile compound = (peak area of volatile compound) / (total  
 542 peak area of all volatile compounds). Compounds were qualitative analyzed on the  
 543 basis of NIST library (<https://webbook.nist.gov/chemistry/>). Values represent means  
 544 of three independent determinations.  
 545

## Parsed Citations

- Bailly A, Groenhagen U, Schulz S, Geisler M, Eberl L, Weisskopf L (2014) The inter-kingdom volatile signal indole promotes root development by interfering with auxin signalling. *Plant J* 80: 758-771  
Google Scholar: [Author Only](#) [Title Only](#) [Author and Title](#)
- Bais HP, Fall R, Vivanco JM (2004) Biocontrol of *Bacillus subtilis* against infection of *Arabidopsis* roots by *Pseudomonas syringae* is facilitated by biofilm formation and surfactin production. *Plant Physiology* 134: 307-319  
Google Scholar: [Author Only](#) [Title Only](#) [Author and Title](#)
- Bais HP, Weir TL, Perry LG, Gilroy S, Vivanco JM (2006) The role of root exudates in rhizosphere interactions with plants and other organisms. *Annual Review of Plant Biology* 57: 233-266  
Google Scholar: [Author Only](#) [Title Only](#) [Author and Title](#)
- Beauregard PB, Chai Y, Vamakis H, Losick R, Kolter R (2013) *Bacillus subtilis* biofilm induction by plant polysaccharides. *Proceedings of the National Academy of Sciences of the United States of America* 110: E1621-E1630  
Google Scholar: [Author Only](#) [Title Only](#) [Author and Title](#)
- Benkova E, Michniewicz M, Sauer M, Teichmann T, Seifertova D, Jurgens G, Friml J (2003) Local, efflux-dependent auxin gradients as a common module for plant organ formation. *Cell* 115: 591-602  
Google Scholar: [Author Only](#) [Title Only](#) [Author and Title](#)
- Bennett MJ, Marchant A, Green HG, May ST, Ward SP, Millner PA, Walker AR, Schulz B, Feldmann KA (1996) *Arabidopsis* AUX1 gene: A permease-like regulator of root gravitropism. *Science* 273: 948-950  
Google Scholar: [Author Only](#) [Title Only](#) [Author and Title](#)
- Bitas V, McCartney N, Li NX, Demers J, Kim JE, Kim HS, Brown KM, Kang S (2015) *Fusarium oxysporum* Volatiles Enhance Plant Growth Via Affecting Auxin Transport and Signaling. *Frontiers in Microbiology* 6  
Google Scholar: [Author Only](#) [Title Only](#) [Author and Title](#)
- Blilou I, Xu J, Wildwater M, Willemsen V, Paponov I, Friml J, Heidstra R, Aida M, Palme K, Scheres B (2005) The PIN auxin efflux facilitator network controls growth and patterning in *Arabidopsis* roots. *Nature* 433: 39-44  
Google Scholar: [Author Only](#) [Title Only](#) [Author and Title](#)
- De Rybel B, Vassileva V, Parizot B, Demeulenaere M, Grunewald W, Audenaert D, Van Campenhout J, Overvoorde P, Jansen L, Vanneste S, Moller B, Wilson M, Holman T, Van Isterdael G, Brunoud G, Vuylsteke M, Vernoux T, De Veylder L, Inze D, Weijers D, Bennett MJ, Beeckman T (2010) A novel aux/IAA28 signaling cascade activates GATA23-dependent specification of lateral root founder cell identity. *Current Biology* 20: 1697-1706  
Google Scholar: [Author Only](#) [Title Only](#) [Author and Title](#)
- Dharmasiri N, Dharmasiri S, Estelle M (2005) The F-box protein TIR1 is an auxin receptor. *Nature* 435: 441-445  
Google Scholar: [Author Only](#) [Title Only](#) [Author and Title](#)
- Ditengou FA, Muller A, Rosenkranz M, Felten J, Lasok H, van Doorn MM, Legue V, Palme K, Schnitzler JP, Polle A (2015) Volatile signalling by sesquiterpenes from ectomycorrhizal fungi reprogrammes root architecture. *Nature Communications* 6: 6279  
Google Scholar: [Author Only](#) [Title Only](#) [Author and Title](#)
- Druzhinina IS, Seidl-Seiboth V, Herrera-Estrella A, Horwitz BA, Kenerley CM, Monte E, Mukherjee PK, Zeilinger S, Grigoriev IV, Kubicek CP (2011) *Trichoderma*: the genomics of opportunistic success. *Nature Reviews Microbiology* 9: 749-759  
Google Scholar: [Author Only](#) [Title Only](#) [Author and Title](#)
- Du Y, Scheres B (2018) Lateral root formation and the multiple roles of auxin. *Journal of Experimental Botany* 69: 155-167  
Google Scholar: [Author Only](#) [Title Only](#) [Author and Title](#)
- Dubrovsky JG, Sauer M, Napsucially-Mendivil S, Ivanchenko MG, Friml J, Shishkova S, Celenza J, Benkova E (2008) Auxin acts as a local morphogenetic trigger to specify lateral root founder cells. *Proceedings of the National Academy of Sciences of the United States of America* 105: 8790-8794  
Google Scholar: [Author Only](#) [Title Only](#) [Author and Title](#)
- Felten J, Kohler A, Morin E, Bhalerao RP, Palme K, Martin F, Ditengou FA, Legue V (2009) The Ectomycorrhizal Fungus *Laccaria bicolor* Stimulates Lateral Root Formation in Poplar and *Arabidopsis* through Auxin Transport and Signaling. *Plant Physiology* 151: 1991-2005  
Google Scholar: [Author Only](#) [Title Only](#) [Author and Title](#)
- Fiddaman PJ, Rossall S (1994) Effect of substrate on the production of antifungal volatiles from *Bacillus subtilis*. *Journal of Applied Bacteriology* 76: 395-405  
Google Scholar: [Author Only](#) [Title Only](#) [Author and Title](#)
- Fincheira P, Quiroz A (2018) Microbial volatiles as plant growth inducers. *Microbiological Research* 208: 63-75  
Google Scholar: [Author Only](#) [Title Only](#) [Author and Title](#)
- Fincheira P, Quiroz A (2018) Microbial volatiles as plant growth inducers. *Microbiol Res* 208: 63-75  
Google Scholar: [Author Only](#) [Title Only](#) [Author and Title](#)

**Fukaki H, Nakao Y, Okushima Y, Theologis A, Tasaka M (2005) Tissue-specific expression of stabilized SOLITARY-ROOT/IAA14 alters lateral root development in Arabidopsis. Plant Journal 44: 382-395**

Google Scholar: [Author Only](#) [Title Only](#) [Author and Title](#)

**Fukaki H, Tameda S, Masuda H, Tasaka M (2002) Lateral root formation is blocked by a gain-of-function mutation in the SOLITARY-ROOT/IAA14 gene of Arabidopsis. Plant Journal 29: 153-168**

Google Scholar: [Author Only](#) [Title Only](#) [Author and Title](#)

**Galweiler L, Guan CH, Muller A, Wisman E, Mendgen K, Yephremov A, Palme K (1998) Regulation of polar auxin transport by AtPIN1 in Arabidopsis vascular tissue. Science 282: 2226-2230**

Google Scholar: [Author Only](#) [Title Only](#) [Author and Title](#)

**Garnica-Vergara A, Barrera-Ortiz S, Munoz-Parra E, Raya-Gonzalez J, Mendez-Bravo A, Macias-Rodriguez L, Francisco Ruiz-Herrera L, Lopez-Bucio J (2016) The volatile 6-pentyl-2H-pyran-2-one from Trichoderma atroviride regulates Arabidopsis thaliana root morphogenesis via auxin signaling and ETHYLENE INSENSITIVE 2 functioning. New Phytologist 209: 1496-1512**

Google Scholar: [Author Only](#) [Title Only](#) [Author and Title](#)

**Garnica-Vergara A, Barrera-Ortiz S, Munoz-Parra E, Raya-Gonzalez J, Mendez-Bravo A, Macias-Rodriguez L, Ruiz-Herrera LF, Lopez-Bucio J (2016) The volatile 6-pentyl-2H-pyran-2-one from Trichoderma atroviride regulates Arabidopsis thaliana root morphogenesis via auxin signaling and ETHYLENE INSENSITIVE 2 functioning. New Phytol 209: 1496-1512**

Google Scholar: [Author Only](#) [Title Only](#) [Author and Title](#)

**Hiltbold I, Turlings TCJ (2008) Belowground chemical signaling in maize: When simplicity rhymes with efficiency. Journal of Chemical Ecology 34: 628-635**

Google Scholar: [Author Only](#) [Title Only](#) [Author and Title](#)

**Himanen K, Boucheron E, Vanneste S, Engler JD, Inze D, Beeckman T (2002) Auxin-mediated cell cycle activation during early lateral root initiation. Plant Cell 14: 2339-2351**

Google Scholar: [Author Only](#) [Title Only](#) [Author and Title](#)

**Hung R, Lee S, Bennett JW (2013) Arabidopsis thaliana as a model system for testing the effect of Trichoderma volatile organic compounds. Fungal Ecology 6: 19-26**

Google Scholar: [Author Only](#) [Title Only](#) [Author and Title](#)

**Kanchiswamy CN, Mainoy M, Maffei ME (2015) Chemical diversity of microbial volatiles and their potential for plant growth and productivity. Frontiers in Plant Science 6**

Google Scholar: [Author Only](#) [Title Only](#) [Author and Title](#)

**Kanchiswamy CN, Malnoy M, Maffei ME (2015) Chemical diversity of microbial volatiles and their potential for plant growth and productivity. Front Plant Sci 6: 151**

Google Scholar: [Author Only](#) [Title Only](#) [Author and Title](#)

**Laskowski M, Biller S, Stanley K, Kajstura T, Prusty R (2006) Expression profiling of auxin-treated Arabidopsis roots: Toward a molecular analysis of lateral root emergence. Plant and Cell Physiology 47: 788-792**

Google Scholar: [Author Only](#) [Title Only](#) [Author and Title](#)

**Laskowski M, Ten Tusscher KH (2017) Periodic lateral root priming: What makes it tick? Plant Cell 29: 432-444**

Google Scholar: [Author Only](#) [Title Only](#) [Author and Title](#)

**Lavenus J, Goh T, Roberts I, Guyomarc'h S, Lucas M, De Smet I, Fukaki H, Beeckman T, Bennett M, Laplaze L (2013) Lateral root development in Arabidopsis: fifty shades of auxin. Trends Plant Sci 18: 450-458**

Google Scholar: [Author Only](#) [Title Only](#) [Author and Title](#)

**Lee HW, Kim MJ, Kim NY, Lee SH, Kim J (2013) LBD18 acts as a transcriptional activator that directly binds to the EXPANSIN14 promoter in promoting lateral root emergence of Arabidopsis. Plant Journal 73: 212-224**

Google Scholar: [Author Only](#) [Title Only](#) [Author and Title](#)

**Li Y, Shao J, Xie Y, Jia L, Fu Y, Xu Z, Zhang N, Feng H, Xun W, Liu Y, Shen Q, Xuan W, Zhang R (2021) Volatile compounds from beneficial rhizobacteria Bacillus spp. promote periodic lateral root development in Arabidopsis. Plant, cell & environment**

Google Scholar: [Author Only](#) [Title Only](#) [Author and Title](#)

**Maffei ME, Gertsch J, Appendino G (2011) Plant volatiles: Production, function and pharmacology. Natural Product Reports 28: 1359-1380**

Google Scholar: [Author Only](#) [Title Only](#) [Author and Title](#)

**Malamy JE, Benfey PN (1997) Organization and cell differentiation in lateral roots of Arabidopsis thaliana. Development 124: 33-44**

Google Scholar: [Author Only](#) [Title Only](#) [Author and Title](#)

**Marchant A, Bhalarao R, Casimiro I, Eklof J, Casero PJ, Bennett M, Sandberg G (2002) AUX1 promotes lateral root formation by facilitating indole-3-acetic acid distribution between sink and source tissues in the Arabidopsis seedling. Plant Cell 14: 589-597**

Google Scholar: [Author Only](#) [Title Only](#) [Author and Title](#)

**Mendes R, Garbeva P, Raaijmakers JM (2013) The rhizosphere microbiome: significance of plant beneficial, plant pathogenic, and human pathogenic microorganisms. Fems Microbiology Reviews 37: 634-663**

Google Scholar: [Author Only](#) [Title Only](#) [Author and Title](#)

**Meng X, Miao Y, Liu Q, Ma L, Guo K, Liu D, Ran W, Shen Q (2019) TgSWO from *Trichoderma guizhouense* NJAU4742 promotes growth in cucumber plants by modifying the root morphology and the cell wall architecture. *Microbial Cell Factories* 18**

Google Scholar: [Author Only](#) [Title Only](#) [Author and Title](#)

**Moreno-Risueno MA, Van Norman JM, Moreno A, Zhang J, Ahnert SE, Benfey PN (2010) Oscillating gene expression determines competence for periodic *Arabidopsis* root branching. *Science* 329: 1306-1311**

Google Scholar: [Author Only](#) [Title Only](#) [Author and Title](#)

**Muller A, Faubert P, Hagen M, Castell WZ, Polle A, Schnitzler JP, Rosenkranz M (2013) Volatile profiles of fungi - Chemotyping of species and ecological functions. *Fungal Genetics and Biology* 54: 25-33**

Google Scholar: [Author Only](#) [Title Only](#) [Author and Title](#)

**Neuteboom LW, Ng JMY, Kuyper M, Clijdesdale OR, Hooykaas PJJ, van der Zaal BJ (1999) Isolation and characterization of cDNA clones corresponding with mRNAs that accumulate during auxin-induced lateral root formation. *Plant Molecular Biology* 39: 273-287**

Google Scholar: [Author Only](#) [Title Only](#) [Author and Title](#)

**Noh B, Murphy AS, Spalding EP (2001) Multidrug resistance-like genes of *Arabidopsis* required for auxin transport and auxin-mediated development. *Plant Cell* 13: 2441-2454**

Google Scholar: [Author Only](#) [Title Only](#) [Author and Title](#)

**Okushima Y, Fukaki H, Onoda M, Theologis A, Tasaka M (2007) ARF7 and ARF19 regulate lateral root formation via direct activation of LBD/ASL genes in *Arabidopsis*. *Plant Cell* 19: 118-130**

Google Scholar: [Author Only](#) [Title Only](#) [Author and Title](#)

**Okushima Y, Overvoorde PJ, Arima K, Alonso JM, Chan A, Chang C, Ecker JR, Hughes B, Lui A, Nguyen D, Onodera C, Quach H, Smith A, Yu GX, Theologis A (2005) Functional genomic analysis of the AUXIN RESPONSE FACTOR gene family members in *Arabidopsis thaliana*: Unique and overlapping functions of ARF7 and ARF19. *Plant Cell* 17: 444-463**

Google Scholar: [Author Only](#) [Title Only](#) [Author and Title](#)

**Peret B, Li GW, Zhao J, Band LR, Voss U, Postaire O, Luu DT, Da Ines O, Casimiro I, Lucas M, Wells DM, Lazzerini L, Nacry P, King JR, Jensen OE, Schaffner AR, Maurel C, Bennett MJ (2012) Auxin regulates aquaporin function to facilitate lateral root emergence. *Nature Cell Biology* 14: 991-+**

Google Scholar: [Author Only](#) [Title Only](#) [Author and Title](#)

**Perez-Flores P, Valencia-Cantero E, Altamirano-Hernandez J, Pelagio-Flores R, Lopez-Bucio J, Garcia-Juarez P, Macias-Rodriguez L (2017) *Bacillus methylotrophicus* M4-96 isolated from maize (*Zea mays*) rhizosphere increases growth and auxin content in *Arabidopsis thaliana* via emission of volatiles. *Protoplasma* 254: 2201-2213**

Google Scholar: [Author Only](#) [Title Only](#) [Author and Title](#)

**Philippot L, Raaijmakers JM, Lemanceau P, van der Putten WH (2013) Going back to the roots: the microbial ecology of the rhizosphere. *Nature Reviews Microbiology* 11: 789-799**

Google Scholar: [Author Only](#) [Title Only](#) [Author and Title](#)

**Pickett FB, Wilson AK, Estelle M (1990) The aux1 mutation of *Arabidopsis* confers both auxin and ethylene resistance. *Plant Physiology* 94: 1462-1466**

Google Scholar: [Author Only](#) [Title Only](#) [Author and Title](#)

**Piechulla B, Lemfack MC, Kai M (2017) Effects of discrete bioactive microbial volatiles on plants and fungi. *Plant Cell and Environment* 40: 2042-2067**

Google Scholar: [Author Only](#) [Title Only](#) [Author and Title](#)

**Rodriguez-Concepcion M (2006) Early steps in isoprenoid biosynthesis: Multilevel regulation of the supply of common precursors in plant cells. *Phytochemistry Reviews* 5: 1-15**

Google Scholar: [Author Only](#) [Title Only](#) [Author and Title](#)

**Roman G, Lubarsky B, Kieber JJ, Rothenberg M, Ecker JR (1995) Genetic analysis of ethylene signal transduction in *Arabidopsis thaliana*: five novel mutant loci integrated into a stress response pathway. *Genetics* 139: 1393-1409**

Google Scholar: [Author Only](#) [Title Only](#) [Author and Title](#)

**Sabatini S, Beis D, Wolkenfelt H, Murfett J, Guilfoyle T, Malamy J, Benfey P, Leyser O, Bechtold N, Weisbeek P, Scheres B (1999) An auxin-dependent distal organizer of pattern and polarity in the *Arabidopsis* root. *Cell* 99: 463-472**

Google Scholar: [Author Only](#) [Title Only](#) [Author and Title](#)

**Santos Teixeira JA, Ten Tusscher KH (2019) The Systems Biology of Lateral Root Formation: Connecting the Dots. *Mol Plant* 12: 784-803**

Google Scholar: [Author Only](#) [Title Only](#) [Author and Title](#)

**Schmidt R, Cordovez V, de Boer W, Raaijmakers J, Garbeva P (2015) Volatile affairs in microbial interactions. *ISME Journal* 9: 2329-2335**

Google Scholar: [Author Only](#) [Title Only](#) [Author and Title](#)

**Schulz S, Dickschat JS (2007) Bacterial volatiles: the smell of small organisms. *Natural Product Reports* 24: 814-842**



Google Scholar: [Author Only](#) [Title Only](#) [Author and Title](#)

**Splivallo R, Novero M, Berteza CM, Bossi S, Bonfante P (2007) Truffle volatiles inhibit growth and induce an oxidative burst in *Arabidopsis thaliana*. *New Phytologist* 175: 417-424**

Google Scholar: [Author Only](#) [Title Only](#) [Author and Title](#)

**Strobel GA, Dirkse E, Sears J, Markworth C (2001) Volatile antimicrobials from *Muscodor albus*, a novel endophytic fungus. *Microbiology-Sgm* 147: 2943-2950**

Google Scholar: [Author Only](#) [Title Only](#) [Author and Title](#)

**Swarup K, Benkova E, Swarup R, Casimiro I, Peret B, Yang Y, Parry G, Nielsen E, De Smet I, Vanneste S, Levesque MP, Carrier D, James N, Calvo V, Ljung K, Kramer E, Roberts R, Graham N, Marillonnet S, Patel K, Jones JDG, Taylor CG, Schachtman DP, May S, Sandberg G, Benfey P, Friml J, Kerr I, Beeckman T, Laplace L, Bennett MJ (2008) The auxin influx carrier LAX3 promotes lateral root emergence. *Nature Cell Biology* 10: 946-954**

Google Scholar: [Author Only](#) [Title Only](#) [Author and Title](#)

**Tirranen LS, Gitelson II (2006) The role of volatile metabolites in microbial communities of the LSS higher plant link. *Advances in Space Research* 38: 1227-1232**

Google Scholar: [Author Only](#) [Title Only](#) [Author and Title](#)

**Tyc O, Song C, Dickschat JS, Vos M, Garbeva P (2017) The Ecological Role of Volatile and Soluble Secondary Metabolites Produced by Soil Bacteria. *Trends Microbiol* 25: 280-292**

Google Scholar: [Author Only](#) [Title Only](#) [Author and Title](#)

**Ulmasov T, Murfett J, Hagen G, Guilfoyle TJ (1997) Aux/IAA proteins repress expression of reporter genes containing natural and highly active synthetic auxin response elements. *Plant Cell* 9: 1963-1971**

Google Scholar: [Author Only](#) [Title Only](#) [Author and Title](#)

**Vacheron J, Desbrosses G, Bouffaud ML, Touraine B, Moenne-Loccoz Y, Muller D, Legendre L, Wisniewski-Dye F, Prigent-Combaret C (2013) Plant growth-promoting rhizobacteria and root system functioning. *Front Plant Sci* 4: 356**

Google Scholar: [Author Only](#) [Title Only](#) [Author and Title](#)

**van Berkel K, de Boer RJ, Scheres B, ten Tusscher K (2013) Polar auxin transport: models and mechanisms. *Development* 140: 2253-2268**

Google Scholar: [Author Only](#) [Title Only](#) [Author and Title](#)

**van Dam NM, Bouwmeester HJ (2016) Metabolomics in the Rhizosphere: Tapping into Belowground Chemical Communication. *Trends in Plant Science* 21: 256-265**

Google Scholar: [Author Only](#) [Title Only](#) [Author and Title](#)

**Van Norman JM, Xuan W, Beeckman T, Benfey PN (2013) To branch or not to branch: the role of pre-patterning in lateral root formation. *Development* 140: 4301-4310**

Google Scholar: [Author Only](#) [Title Only](#) [Author and Title](#)

**Venturi V, Keel C (2016) Signaling in the Rhizosphere. *Trends in Plant Science* 21: 187-198**

Google Scholar: [Author Only](#) [Title Only](#) [Author and Title](#)

**Werner S, Polle A, Brinkmann N (2016) Belowground communication: impacts of volatile organic compounds (VOCs) from soil fungi on other soil-inhabiting organisms. *Appl Microbiol Biotechnol* 100: 8651-8665**

Google Scholar: [Author Only](#) [Title Only](#) [Author and Title](#)

**Xie Y, Wang J, Zheng L, Wang Y, Luo L, Ma M, Zhang C, Han Y, Beeckman T, Xu G, Cai Q, Xuan W (2019) Cadmium stress suppresses lateral root formation by interfering with the root clock. *Plant, Cell & Environment* 42: 3182-3196**

Google Scholar: [Author Only](#) [Title Only](#) [Author and Title](#)

**Xuan W, Audenaert D, Parizot B, Moller BK, Njo MF, De Rybel B, De Rop G, Van Isterdael G, Mahonen AP, Vanneste S, Beeckman T (2015) Root cap-derived auxin pre-patterns the longitudinal axis of the *Arabidopsis* root. *Current Biology* 25: 1381-1388**

Google Scholar: [Author Only](#) [Title Only](#) [Author and Title](#)

**Xuan W, De Gernier H, Beeckman T (2020) The dynamic nature and regulation of the root clock. *Development* 147: dev181446**

Google Scholar: [Author Only](#) [Title Only](#) [Author and Title](#)

**Xuan W, Opendacker D, Vanneste S, Beeckman T (2018) Long-term in vivo imaging of luciferase-based reporter gene expression in *Arabidopsis* roots. *Methods in molecular biology* (Clifton, N.J.) 1761: 177-190**

Google Scholar: [Author Only](#) [Title Only](#) [Author and Title](#)

**Zadnikova P, Petrasek J, Marhavy P, Raz V, Vandebussche F, Ding Z, Schwarzerova K, Morita MT, Tasaka M, Hejatko J, Van Der Straeten D, Friml J, Benkova E (2010) Role of PIN-mediated auxin efflux in apical hook development of *Arabidopsis thaliana*. *Development* 137: 607-617**

Google Scholar: [Author Only](#) [Title Only](#) [Author and Title](#)

**Zhang H, Kim MS, Krishnamachari V, Payton P, Sun Y, Grimson M, Farag MA, Ryu CM, Allen R, Melo IS, Pare PW (2007) Rhizobacterial volatile emissions regulate auxin homeostasis and cell expansion in *Arabidopsis*. *Planta* 226: 839-851**

Google Scholar: [Author Only](#) [Title Only](#) [Author and Title](#)

**Zhang J, Akcapinar GB, Atanasova L, Rahimi MJ, Przylucka A, Yang D, Kubicek CP, Zhang R, Shen Q, Druzhinina IS (2016) The neutral metallopeptidase NMP1 of *Trichoderma guizhouense* is required for mycotrophy and self-defence. *Environmental Microbiology* 18: 580-597**

Google Scholar: [Author Only](#) [Title Only](#) [Author and Title](#)

**Zhang J, Miao Y, Rahimi MJ, Zhu H, Steindorff A, Schiessler S, Cai F, Pang G, Chenthamara K, Xu Y, Kubicek CP, Shen Q, Druzhinina IS (2019) Guttation capsules containing hydrogen peroxide: an evolutionarily conserved NADPH oxidase gains a role in wars between related fungi. *Environmental Microbiology* 21: 2644-2658**

Google Scholar: [Author Only](#) [Title Only](#) [Author and Title](#)
